# Supplementary material for: Genome-Guided Analysis of Clostridium ultunense and Comparative Genomics Reveal Different Strategies for Acetate Oxidation and Energy Conservation in Syntrophic Acetate-Oxidising Bacteria
Source: PubMed Central journal article supplement (PMC5924567; doi:10.3390/genes9040225), 2018-04-23
Supplement: genes-09-00225-s001.pdf [file genes-09-00225-s001.pdf]

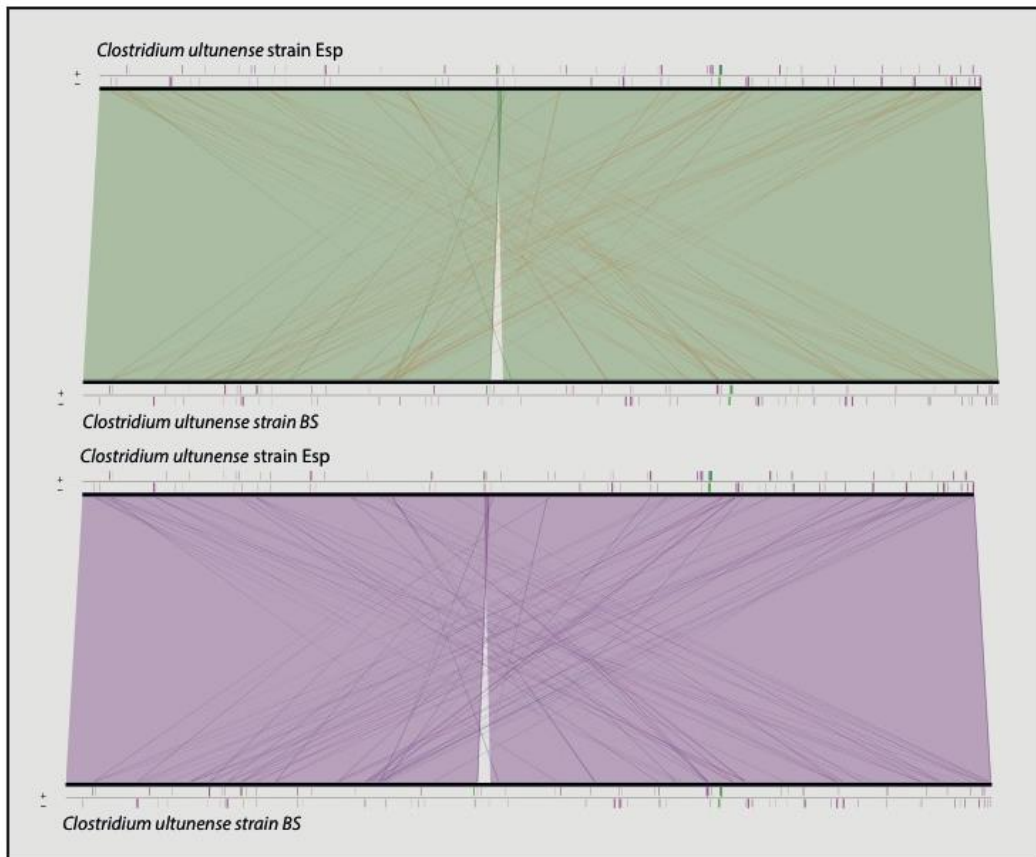

Figure S1. Synteny comparison of *Clostridium ultunense* strain Esp genome with the genome of the type strain *Clostridium ultunense* strain  $BS^T$ . The lines indicate syntons between two genomes. Red lines show inversions around the origin of replication. Vertical bars on the border line indicate different elements in genomes, where pink = transposases or insertion sequences, blue = rRNA and green = tRNA.

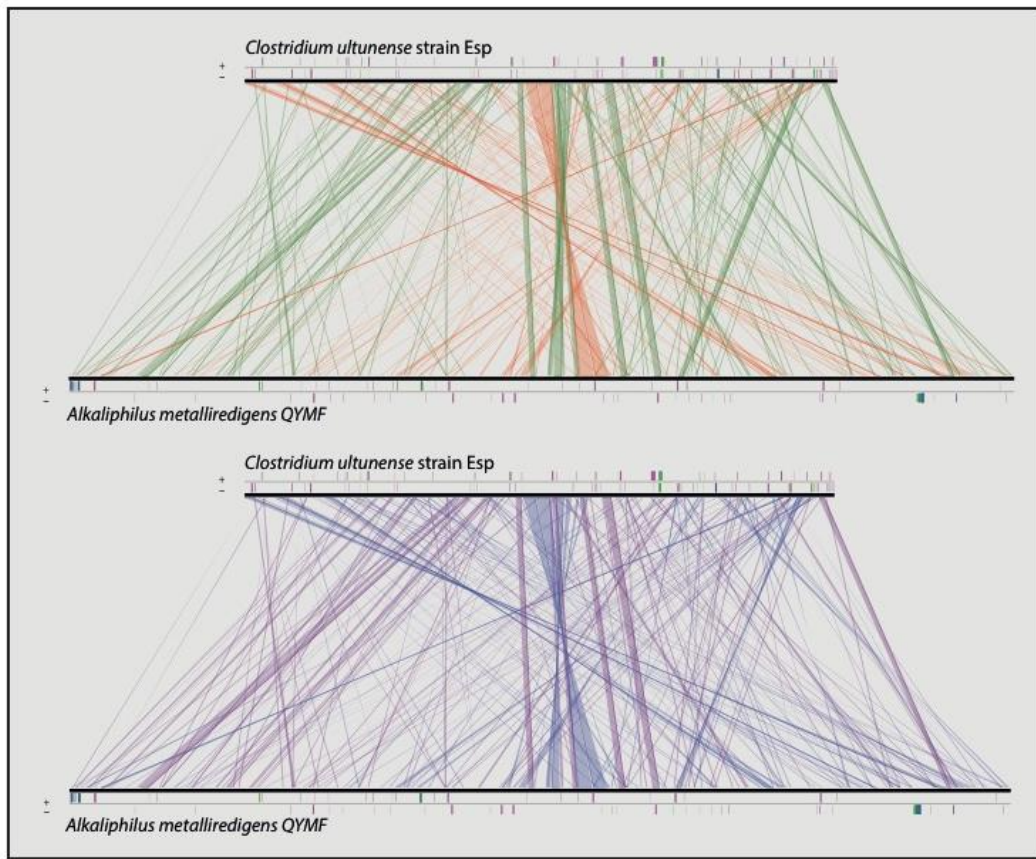

Figure S2. Synteny comparison of *Clostridium ultunense* strain Esp genome with the genome of *Alkaliphilus metalliredigens* QYMF. The lines indicate syntons between two genomes. Red lines show inversions around the origin of replication. Vertical bars on the border line indicate different elements in genomes, where pink = transposases or insertion sequences, blue = rRNA and green = tRNA.

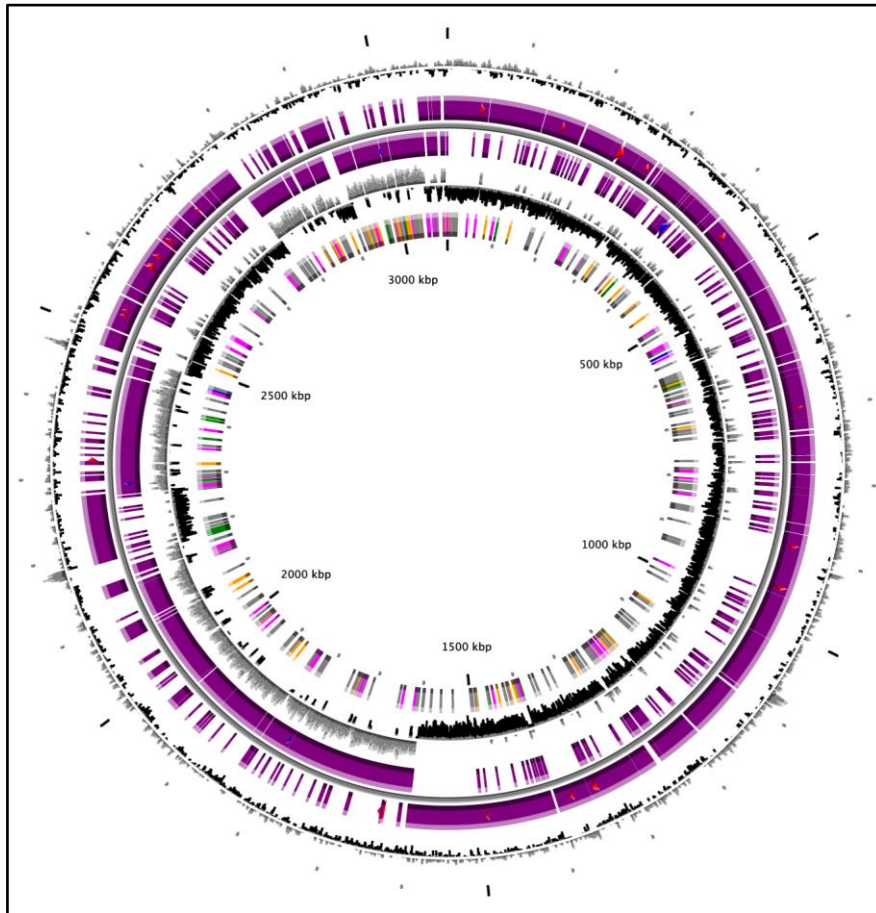

Figure S3. Circular map of the genome of *Clostridium ultunense* strain Esp. From outside to centre: (1) GC percent deviation (GC window - mean GC) in a 1000-bp window; (2) predicted CDSs transcribed in a clockwise direction; (3) predicted CDSs transcribed in a counter-clockwise direction; (4) GC skew (G+C/G-C) in a 1000-bp window; (5) rRNA (blue), tRNA (green), misc\_RNA (orange), transposable elements (pink) and pseudogenes (grey). For more details see Table S1.

Table S1. Genome statistics for *Clostridium ultunense* Esp.

| Attribute                        | Value     | % of total |
|----------------------------------|-----------|------------|
| Genome size (bp)                 | 3,093,245 | 100.00     |
| DNA coding (bp)                  | 2,629,258 | 85.00      |
| DNA G+C content (bp)             | 9,89,838  | 32.40      |
| Number of scaffolds              | 1         | -          |
| Total genes                      | 3,303     | 100.00     |
| Protein coding genes             | 3,236     | 97.97      |
| RNA genes                        | 66        | 1.25       |
| Pseudo gene                      | 57        | 1.99       |
| Genes in internal clusters       | 1,580     | 45.00      |
| Genes with function prediction   | 1,472     | 43.00      |
| Genes assigned to COGs           | 2,623     | 79.41      |
| Genes with Pfam domains          | 2,675     | 81.84      |
| Genes with signal peptides       | 213       | 6.44       |
| Genes with transmembrane helices | 759       | 22.97      |
| CRISPR repeats                   | 8         | 0.24       |

Table S2. Presences of phages and phage remnants in *Clostridium ultunense* ESP, *Clostridium ultunense* BS<sup>T</sup>, *Pseudothermotoga lettingae* TMO, *Syntrophaceticus schinkii* Sp3 and *Tepidanaerobacter acetatoxydans* Re1 genomes at time point of DNA isolation[1-3]. % of the genome which is predicted to encode prophage related genes are given in parenthesis.

| <b>Clostridium ultunense ESP (3,33%)</b>            |               |              |                |                 |                                   |        |
|-----------------------------------------------------|---------------|--------------|----------------|-----------------|-----------------------------------|--------|
| Region                                              | Region Length | Completeness | Total Proteins | Region position | Most Common Phage                 | GC%    |
| 1                                                   | 7.7kb         | Incomplete   | 9              | 86131-93902     | PHAGE_Bacill_SP (NC_031245)       | 32.93% |
| 2                                                   | 24.4kb        | Incomplete   | 21             | 1717007-1741436 | PHAGE_Synech_ACG (NC_026927)      | 30.63% |
| 3                                                   | 29kb          | Questionable | 21             | 1813843-1842869 | PHAGE_Mycoba_Panchino (NC_031281) | 31.06% |
| 4                                                   | 6.8kb         | Incomplete   | 9              | 2943158-2950029 | PHAGE_Staphy_SPbeta (NC_029119)   | 32.17% |
| 5                                                   | 35.2kb        | Intact       | 21             | 3051263-3086475 | PHAGE_Stx2_c_1717 (NC_011357)     | 32.38% |
| <b>Clostridium ultunense BS<sup>T</sup> (1,13%)</b> |               |              |                |                 |                                   |        |
| 1                                                   | 36.4kb        | Intact       | 24             | 3172444-3208864 | PHAGE_Stx2_c_1717 (NC_011357)     | 31.03% |
| <b>Pseudothermotoga lettingae TMO (1,7%)</b>        |               |              |                |                 |                                   |        |
| 1                                                   | 11kb          | Incomplete   | 14             | 999988-1010999  | PHAGE_Plankt_LD (NC_016564)       | 37.88% |
| 2                                                   | 8kb           | Incomplete   | 9              | 1115311-1123336 | PHAGE_Synech_S_CAM7 (NC_031927)   | 39.22% |
| 3                                                   | 7.5kb         | Incomplete   | 9              | 1465825-1473383 | PHAGE_Geobac_E3 (NC_29073)        | 35.79% |
| 4                                                   | 10.3kb        | Incomplete   | 10             | 1881355-1991711 | PHAGE_Prochl_P_SSM2 (NC_006883)   | 39.65% |
| <b>Syntrophaceticus schinkii SP3 (1,8%)</b>         |               |              |                |                 |                                   |        |
| 1                                                   | 4.7kb         | Incomplete   | 7              | 88-4845         | PHAGE_pSEUDO_JG004 (NC_019450)    | 48.97% |
| 2                                                   | 17.2kb        | Incomplete   | 11             | 101385-118628   | PHAGE_Bacill_Blue (NC_031056)     | 49.71% |
| 3                                                   | 8.1kb         | Incomplete   | 9              | 2560898-2569090 | PHAGE_Prochl_P_SSM2 (NC_006883)   | 51.39% |
| 4                                                   | 26.9kb        | Incomplete   | 9              | 2846491-2873463 | PHAGE_Plankt_PaV_LD (NC_016564)   | 43.36% |
| <b>Thermacetogenium phaeum PB (1.45%)</b>           |               |              |                |                 |                                   |        |
| 1                                                   | 42.8          | Intact       | 41             | 2330541-2373372 | PHAGE_Lactoc_28201 NC_031013      | 44.95% |

1. Manzoor S, Bongcam-Rudloff E, Schnurer A, Muller B. Genome-Guided Analysis and Whole Transcriptome Profiling of the Mesophilic Syntrophic Acetate Oxidising Bacterium *Syntrophaceticus schinkii*. PLoS ONE. 2016;11(11):e0166520. Epub 2016/11/17. doi: 10.1371/journal.pone.0166520. PubMed PMID: 27851830; PubMed Central PMCID: PMC5113046.
2. Müller B, Manzoor S, Niazi A, Bongcam-Rudloff E, Schnürer A. Genome-guided analysis of physiological capacities of *Tepidanaerobacter acetatoxydans* provides insights into environmental adaptations and syntrophic acetate oxidation. PLoS ONE. 2015;10(3):e0121237. doi: 10.1371/journal.pone.0121237.
3. Oehler D, Poehlein A, Leimbach A, Müller N, Daniel R, Gottschalk G, et al. Genome-guided analysis of physiological and morphological traits of the fermentative acetate oxidizer *Thermacetogenium phaeum*. BMC Genomics. 2012;13(1):723. doi: 10.1186/1471-2164-13-723.

Table S3. ABC transporter related genes found in *Clostridium ultunense* strain ESP.

| <i>Clostridium ultunense</i> | Product                                                                                    |
|------------------------------|--------------------------------------------------------------------------------------------|
| CUESP_0051                   | Energizing coupling factor of ABC influx transporter (ATP-binding protein)                 |
| CUESP_0052                   | Energizing coupling factor of ABC influx transporter (ATP-binding protein)                 |
| CUESP_0069                   | ABC transporter, substrate-binding lipoprotein                                             |
| CUESP_0070                   | ABC transporter, permease protein                                                          |
| CUESP_0071                   | Nitrate ABC transporter                                                                    |
| CUESP_0120                   | Oligopeptide ABC transporter, periplasmic oligopeptide-binding protein OppA (TC 3.A.1.5.1) |
| CUESP_0121                   | Oligopeptide ABC transporter (permease)                                                    |
| CUESP_0122                   | Oligopeptide ABC transporter (permease)                                                    |
| CUESP_0123                   | Oligopeptide ABC transporter (ATP-binding protein)                                         |
| CUESP_0124                   | Oligopeptide ABC transporter (ATP-binding protein)                                         |
| CUESP_0138                   | ABC transporter related protein                                                            |
| CUESP_0154                   | ABC transporter related                                                                    |
| CUESP_0204                   | Cell-division ABC transporter (ATP-binding protein)                                        |
| CUESP_0281                   | Bacitracin ABC efflux transporter (ATP-binding protein)                                    |
| CUESP_0282                   | Efflux ABC transporter, permease protein                                                   |
| CUESP_0283                   | Putative ABC efflux transporter (ATP-binding protein)                                      |
| CUESP_0284                   | Putative ABC-2 type transport system permease protein                                      |
| CUESP_0303                   | Putative peptide ABC transporter permease protein y4tP                                     |
| CUESP_0304                   | Putative peptide transporter permease subunit: membrane component of ABC superfamily       |
| CUESP_0305                   | Oligopeptide ABC transporter (ATP-binding protein)                                         |
| CUESP_0306                   | Oligopeptide ABC transporter (ATP-binding protein)                                         |
| CUESP_0322                   | Phosphate ABC transporter ATP-binding protein                                              |
| CUESP_0323                   | ABC transporter protein                                                                    |
| CUESP_0365                   | Ribose ABC transporter (ATP-binding protein)                                               |
| CUESP_0366                   | D-ribose transporter subunit ; membrane component of ABC superfamily                       |
| CUESP_0399                   | ABC transporter related                                                                    |
| CUESP_0404                   | Putative ABC transporter permease protein                                                  |
| CUESP_0405                   | Putative ABC transporter permease protein                                                  |
| CUESP_0406                   | ABC transporter, ATP-binding protein                                                       |
| CUESP_0437                   | Putative permease of ABC transporter                                                       |
| CUESP_0438                   | Putative ABC transporter component, ATP-binding                                            |
| CUESP_0443                   | ABC transporter related protein (fragment)                                                 |
| CUESP_0468                   | Sulfur mobilizing ABC protein, ATPase                                                      |
| CUESP_0493                   | Guanosine ABC transporter (ATP-binding protein)                                            |
| CUESP_0495                   | Permease of ABC guanosine transporter                                                      |
| CUESP_0635                   | Phosphate ABC transporter (ATP-binding protein)                                            |
| CUESP_0636                   | ABC transporter membrane-spanning permease-phosphate transport                             |
| CUESP_0637                   | Putative ABC transporter permease protein                                                  |
| CUESP_0686                   | Fragment of guanosine ABC transporter (ATP-binding protein) (part 1)                       |
| CUESP_0687                   | Fragment of guanosine ABC transporter (ATP-binding protein) (part 2)                       |
| CUESP_0731                   | Putative iron-siderophore ABC transporter (ATP-binding protein) (fragment)                 |
| CUESP_0816                   | Putative high-affinity branched-chain amino acid ABC transporter, permease protein LivH    |
| CUESP_0817                   | Branched-chain amino acid ABC transporter, permease protein                                |
| CUESP_0818                   | Leucine/isoleucine/valine transporter subunit ; ATP-binding component of ABC superfamily   |
| CUESP_0819                   | Leucine/isoleucine/valine transporter subunit ; ATP-binding component of ABC superfamily   |
| CUESP_0922                   | Antibiotic ABC superfamily ATP binding cassette transporter                                |

|            |                                                                                                         |
|------------|---------------------------------------------------------------------------------------------------------|
| CUESP_0928 | ABC transporter related                                                                                 |
| CUESP_0935 | Guanosine ABC transporter (ATP-binding protein) (fragment)                                              |
| CUESP_0936 | Ribose ABC transporter (ATP-binding protein) (fragment)                                                 |
| CUESP_0941 | Ribose ABC transporter (ATP-binding protein)                                                            |
| CUESP_0942 | Fragment of ribose ABC transporter (permease) (part 1)                                                  |
| CUESP_0943 | Fragment of ribose ABC transporter (permease) (part 2)                                                  |
| CUESP_1009 | Putative ABC transporter permease protein HI_1471                                                       |
| CUESP_1011 | ABC-type transporter, periplasmic subunit                                                               |
| CUESP_1037 | Leucine/isoleucine/valine transporter subunit ; membrane component of ABC superfamily                   |
| CUESP_1039 | Leucine/isoleucine/valine transporter subunit ; ATP-binding component of ABC superfamily                |
| CUESP_1040 | Leucine/isoleucine/valine transporter subunit ; ATP-binding component of ABC superfamily                |
| CUESP_1053 | Ribose ABC transporter (ATP-binding protein)                                                            |
| CUESP_1054 | D-ribose transporter subunit membrane component of ABC superfamily                                      |
| CUESP_1055 | ABC-type sugar transport system periplasmic component-like protein                                      |
| CUESP_1091 | Putative ABC-type transport system, periplasmic component/surface lipoprotein                           |
| CUESP_1092 | Uncharacterized ABC transporter ATP-binding protein YufO                                                |
| CUESP_1093 | ABC-type uncharacterized transport system,permease component                                            |
| CUESP_1094 | Putative ABC-type transport system, permease component                                                  |
| CUESP_1109 | Oligopeptide ABC transporter (ATP-binding protein)                                                      |
| CUESP_1110 | Putative cell wall oligopeptide ABC transporter (ATP binding protein)                                   |
| CUESP_1135 | Oligopeptide/dipeptide ABC transporter                                                                  |
| CUESP_1136 | Oligopeptide/dipeptide ABC transporter,permease protein                                                 |
| CUESP_1137 | Oligopeptide ABC transporter (ATP-binding protein)                                                      |
| CUESP_1138 | Putative cell wall oligopeptide ABC transporter (ATP binding protein)                                   |
| CUESP_1139 | Oligopeptide/dipeptide ABC transporter                                                                  |
| CUESP_1334 | ABC transporter-like protein                                                                            |
| CUESP_1381 | Putative ABC transporter (ATP-binding protein)                                                          |
| CUESP_1382 | Putative Uncharacterized ABC transporter permease YvcS                                                  |
| CUESP_1398 | Aliphatic sulfonate ABC transporter (ATP-binding protein)                                               |
| CUESP_1419 | ABC-type transport system, permease component                                                           |
| CUESP_1420 | ABC transporter permease                                                                                |
| CUESP_1434 | ABC transporter related (fragment)                                                                      |
| CUESP_1499 | High affinity arginine ABC transporter (permease)                                                       |
| CUESP_1500 | High affinity arginine ABC transporter (ATP-binding protein)                                            |
| CUESP_1977 | ABC transporter, permease protein                                                                       |
| CUESP_1978 | ABC transporter, substrate-binding protein                                                              |
| CUESP_2110 | Putative ABC-type cobalt transport system permease component CbiQ and related transporters-like protein |
| CUESP_2111 | ABC transporter related                                                                                 |
| CUESP_2112 | ABC transporter, ATP-binding protein                                                                    |
| CUESP_2242 | Cobalt ABC transporter, inner membrane subunit CbiQ                                                     |
| CUESP_2249 | ABC transporter related                                                                                 |
| CUESP_2251 | Putative Iron compound ABC transporter,periplasmic iron compound-binding protein                        |
| CUESP_2252 | Abc-2 transporter, permease protein                                                                     |
| CUESP_2254 | Iron-dicitrate ABC transporter (permease)                                                               |
| CUESP_2260 | ABC transporter related protein                                                                         |
| CUESP_2289 | Uncharacterized ABC transporter ATP-binding protein YwjA                                                |
| CUESP_2391 | Fructose-amino acid ABC transporter (ATP-binding subunit) (fragment)                                    |
| CUESP_2393 | Polyamine transporter subunit ; membrane component of ABC superfamily                                   |
| CUESP_2394 | Spermidine/putrescine ABC transporter, permease protein 2                                               |
| CUESP_2447 | ABC-type transporter, periplasmic subunit                                                               |
| CUESP_2448 | ABC-type transporter, integral membrane subunit                                                         |

|            |                                                            |
|------------|------------------------------------------------------------|
| CUESP_2449 | ABC-type transporter, integral membrane subunit            |
| CUESP_2450 | Oligopeptide ABC transporter (ATP-binding protein)         |
| CUESP_2451 | Oligopeptide ABC transporter (ATP-binding protein)         |
| CUESP_2521 | Methionine ABC transporter (ATP-binding protein)           |
| CUESP_2522 | Methionine ABC transporter, permease component             |
| CUESP_2523 | Methionine ABC transporter, substrate binding lipoprotein  |
| CUESP_2635 | ABC transporter, ATP-binding protein                       |
| CUESP_2761 | Efflux ABC transporter, permease protein                   |
| CUESP_2804 | ABC transporter related protein                            |
| CUESP_2814 | Uncharacterized ABC transporter ATP-binding protein YvcR   |
| CUESP_2830 | Putative ABC transporter (ATP-binding protein)             |
| CUESP_2831 | ABC transport system permease protein                      |
| CUESP_2836 | Putative ABC transporter, ATP-binding protein SagG         |
| CUESP_2838 | Putative ABC-2 type transporter                            |
| CUESP_2857 | Putative ABC transporter anion-binding protein HVO_1888    |
| CUESP_2858 | Permease component of tungstate ABC transporter            |
| CUESP_2859 | ATPase component of tungstate ABC transporter (fragment)   |
| CUESP_2879 | ABC transporter related protein                            |
| CUESP_2880 | Putative ABC transporter (ATP-binding protein)             |
| CUESP_2884 | Putative ABC transporter (ATP-binding protein)             |
| CUESP_2887 | ABC transporter related                                    |
| CUESP_2917 | ABC transporter substrate binding protein                  |
| CUESP_2918 | Amino acid or sugar ABC transport system, permease protein |
| CUESP_2919 | ABC transporter, ATP-binding protein                       |
| CUESP_2944 | ABC transporter, ATP-binding protein (fragment)            |
| CUESP_2945 | ABC transporter, ATP-binding protein (fragment)            |
| CUESP_2970 | ABC transporter, ATP-binding protein                       |
| CUESP_3106 | Putative Antibiotic ABC transporter, permease protein      |
| CUESP_3127 | ABC-type multidrug transport system, ATPase component      |
| CUESP_3228 | Oligopeptide ABC transporter (ATP-binding protein)         |
| CUESP_3229 | Oligopeptide ABC transporter (ATP-binding protein)         |
| CUESP_3230 | Oligopeptide ABC transporter (permease)                    |
| CUESP_3231 | Oligopeptide ABC transporter (permease)                    |
| CUESP_3232 | ABC-type transporter, periplasmic subunit                  |
| CUESP_3256 | Fragment of putative ABC transporter component (part 1)    |
| CUESP_3259 | Fragment of putative ABC transporter component (part 2)    |
| CUESP_3335 | Putative ABC transporter permease protein HI_1471          |
| CUESP_3337 | ABC-type transporter, periplasmic subunit                  |



Table S4. ABC transporter related genes found in *Pseudothermotoga lettingae* TMO and *Tepidanaerobacter acetatoxydans* genomes.

| <i>Pseudothermotoga lettingae</i> | Product                                                 |
|-----------------------------------|---------------------------------------------------------|
| Tlet_0021                         | ABC transporter-like protein                            |
| Tlet_0022                         | Polar amino acid ABC transporter inner membrane subunit |
| Tlet_0023                         | Polar amino acid ABC transporter inner membrane subunit |
| Tlet_0075                         | Oligopeptide/dipeptide ABC transporter ATPase           |
| Tlet_0076                         | Oligopeptide/dipeptide ABC transporter ATPase           |
| Tlet_0086                         | ABC transporter-like protein                            |
| Tlet_0137                         | ABC transporter-like protein                            |
| Tlet_0184                         | ABC transporter-like protein                            |
| Tlet_0198                         | Oligopeptide/dipeptide ABC transporter ATPase           |
| Tlet_0199                         | Oligopeptide/dipeptide ABC transporter ATPase           |
| Tlet_0211                         | ABC transporter-like protein                            |
| Tlet_0212                         | ABC transporter-like protein                            |
| Tlet_0296                         | ABC transporter-like protein                            |
| Tlet_0337                         | ABC transporter-like protein                            |
| Tlet_0353                         | Oligopeptide/dipeptide ABC transporter ATPase           |
| Tlet_0354                         | Oligopeptide/dipeptide ABC transporter ATPase           |
| Tlet_0360                         | ABC transporter-like protein                            |
| Tlet_0391                         | ABC transporter-like protein                            |
| Tlet_0463                         | ABC transporter                                         |
| Tlet_0483                         | Polar amino acid ABC transporter inner membrane subunit |
| Tlet_0484                         | ABC transporter-like protein                            |
| Tlet_0485                         | ABC transporter-like protein                            |
| Tlet_0550                         | ABC transporter-like protein                            |
| Tlet_0551                         | ABC transporter                                         |
| Tlet_0552                         | ABC transporter                                         |
| Tlet_0644                         | Oligopeptide/dipeptide ABC transporter ATPase           |
| Tlet_0645                         | Oligopeptide/dipeptide ABC transporter ATPase           |
| Tlet_0647                         | Oligopeptide/dipeptide ABC transporter ATPase           |
| Tlet_0648                         | Oligopeptide/dipeptide ABC transporter ATPase           |
| Tlet_0677                         | ABC transporter-like protein                            |
| Tlet_0721                         | ABC transporter-like protein                            |
| Tlet_0737                         | ABC transporter-like protein                            |
| Tlet_0802                         | ABC transporter-like protein                            |
| Tlet_0803                         | ABC transporter-like protein                            |
| Tlet_0808                         | ABC transporter-like protein                            |
| Tlet_0837                         | ABC transporter-like protein                            |
| Tlet_0839                         | Anion ABC transporter anion-binding protein             |
| Tlet_0856                         | Oligopeptide/dipeptide ABC transporter ATPase           |
| Tlet_0857                         | Oligopeptide/dipeptide ABC transporter ATPase           |
| Tlet_0861                         | Polar amino acid ABC transporter inner membrane subunit |
| Tlet_0862                         | ABC transporter-like protein                            |
| Tlet_0863                         | Polar amino acid ABC transporter inner membrane subunit |
| Tlet_0982                         | ABC transporter-like protein                            |
| Tlet_1020                         | ABC transporter-like protein                            |
| Tlet_1041                         | ABC transporter                                         |
| Tlet_1042                         | ABC transporter-like protein                            |
| Tlet_1045                         | ABC transporter-like protein                            |
| Tlet_1062                         | ABC transporter-like protein                            |
| Tlet_1071                         | ABC transporter-like protein                            |
| Tlet_1072                         | ABC transporter-like protein                            |
| Tlet_1122                         | ABC transporter-like protein                            |
| Tlet_1123                         | ABC transporter-like protein                            |
| Tlet_1210                         | ABC transporter-like protein                            |

|           |                                               |
|-----------|-----------------------------------------------|
| Tlet_1211 | ABC transporter-like protein                  |
| Tlet_1212 | ABC transporter-like protein                  |
| Tlet_1217 | ABC transporter-like protein                  |
| Tlet_1218 | ABC transporter-like protein                  |
| Tlet_1234 | Multidrug ABC transporter ATPase-like protein |
| Tlet_1234 | Multidrug ABC transporter ATPase-like protein |
| Tlet_1235 | ABC transporter                               |
| Tlet_1249 | ABC transporter-like protein                  |
| Tlet_1266 | ABC transporter-like protein                  |
| Tlet_1273 | ABC transporter-like protein                  |
| Tlet_1280 | ABC transporter-like protein                  |
| Tlet_1299 | ABC transporter substrate-binding protein     |
| Tlet_1309 | Oligopeptide/dipeptide ABC transporter ATPase |
| Tlet_1310 | Oligopeptide/dipeptide ABC transporter ATPase |
| Tlet_1320 | ABC transporter-like protein                  |
| Tlet_1327 | ABC transporter-like protein                  |
| Tlet_1342 | ABC transporter-like protein                  |
| Tlet_1353 | ABC transporter-like protein                  |
| Tlet_1372 | ABC transporter-like protein                  |
| Tlet_1415 | ABC transporter-like protein                  |
| Tlet_1416 | ABC transporter-like protein                  |
| Tlet_1419 | ABC transporter-like protein                  |
| Tlet_1441 | Oligopeptide/dipeptide ABC transporter ATPase |
| Tlet_1442 | Oligopeptide/dipeptide ABC transporter ATPase |
| Tlet_1471 | ABC transporter-like protein                  |
| Tlet_1503 | Oligopeptide/dipeptide ABC transporter ATPase |
| Tlet_1504 | Oligopeptide/dipeptide ABC transporter ATPase |
| Tlet_1527 | Oligopeptide/dipeptide ABC transporter ATPase |
| Tlet_1528 | Oligopeptide/dipeptide ABC transporter ATPase |
| Tlet_1560 | ABC transporter-like protein                  |
| Tlet_1561 | Putative ABC-2 type transport system permease |
| Tlet_1608 | ABC transporter-like protein                  |
| Tlet_1609 | ABC transporter-like protein                  |
| Tlet_1641 | ABC transporter-like protein                  |
| Tlet_1678 | ABC transporter-like protein                  |
| Tlet_1699 | Phosphate ABC transporter ATPase              |
| Tlet_1791 | ABC transporter                               |
| Tlet_1792 | ABC transporter-like protein                  |
| Tlet_1834 | ABC transporter                               |
| Tlet_1835 | ABC transporter-like protein                  |
| Tlet_1861 | Putative ABC-2 type transport system permease |
| Tlet_1862 | ABC transporter-like protein                  |
| Tlet_1933 | Oligopeptide/dipeptide ABC transporter ATPase |
| Tlet_1934 | Oligopeptide/dipeptide ABC transporter ATPase |
| Tlet_1937 | ABC transporter-like protein                  |
| Tlet_1938 | ABC transporter-like protein                  |
| Tlet_2004 | Oligopeptide/dipeptide ABC transporter ATPase |
| Tlet_2005 | Oligopeptide/dipeptide ABC transporter ATPase |
| Tlet_2022 | Oligopeptide/dipeptide ABC transporter ATPase |
| Tlet_2023 | Oligopeptide/dipeptide ABC transporter ATPase |

---

***Tepidanaerobacter acetatoydans***

---

|              |                                                               |
|--------------|---------------------------------------------------------------|
| TepiRe1_0051 | Gluconate transporter                                         |
| TepiRe1_0060 | para-aminobenzoyl-glutamate transporter                       |
| TepiRe1_0066 | Citrate transporter                                           |
| TepiRe1_0232 | Energy-coupling factor transporter ATP-binding protein EcfA 2 |
| TepiRe1_0235 | component of the influx ECF transporters                      |
| TepiRe1_0316 | Efflux transporter, RND family, MFP subunit                   |

|              |                                                                   |
|--------------|-------------------------------------------------------------------|
| TepiRe1_0327 | Na <sup>+</sup> /melibiose symporter-like transporter             |
| TepiRe1_0330 | Sugar (Glycoside-Pentoside-Hexuronide) transporter                |
| TepiRe1_0527 | Proton-coupled thiamine transporter YuaJ                          |
| TepiRe1_0553 | MgtC/SapB transporter                                             |
| TepiRe1_0643 | multiple sugar-binding transporter ATP-binding protein            |
| TepiRe1_0760 | Magnesium transporter                                             |
| TepiRe1_0761 | Magnesium transporter                                             |
| TepiRe1_1041 | Gluconate transporter                                             |
| TepiRe1_1610 | Efflux transporter, RND family, MFP subunit                       |
| TepiRe1_1673 | Gluconate transporter                                             |
| TepiRe1_1694 | Na/Pi-cotransporter II-related protein                            |
| TepiRe1_1695 | Na/Pi-cotransporter II-related protein                            |
| TepiRe1_1709 | Tripartite ATP-independent periplasmic transporter DctQ component |
| TepiRe1_1744 | Zinc transporter ZupT                                             |
| TepiRe1_1755 | Chromate transporter                                              |
| TepiRe1_1756 | Chromate transporter                                              |
| TepiRe1_1775 | Cation diffusion facilitator family transporter                   |
| TepiRe1_1787 | Uncharacterized sodium-dependent transporter YocR                 |
| TepiRe1_1858 | Efflux transporter, RND family, MFP subunit                       |
| TepiRe1_1930 | Phosphonate-transporting ATPase                                   |
| TepiRe1_1931 | Efflux transporter, RND family, MFP subunit                       |
| TepiRe1_2032 | putative formate transporter                                      |
| TepiRe1_2108 | Tripartite ATP-independent periplasmic transporter DctQ component |
| TepiRe1_2216 | Phosphate transporter                                             |
| TepiRe1_2303 | Gluconate transporter                                             |
| TepiRe1_2306 | Gluconate transporter                                             |
| TepiRe1_2464 | Gluconate transporter                                             |
| TepiRe1_2523 | Uncharacterized sodium-dependent transporter YocR                 |
| TepiRe1_2685 | Chromate transporter                                              |
| TepiRe1_2686 | Chromate transporter                                              |
| TepiRe1_2689 | Chromate transporter                                              |
| TepiRe1_2690 | Chromate transporter                                              |
| TepiRe1_2758 | Putative biotin transporter BioY                                  |

---

1. Manzoor S, Bongcam-Rudloff E, Schnurer A, Muller B. Genome-Guided Analysis and Whole Transcriptome Profiling of the Mesophilic Syntrophic Acetate Oxidising Bacterium *Syntrophaceticus schinkii*. PLoS ONE. 2016;11(11):e0166520. Epub 2016/11/17. doi: 10.1371/journal.pone.0166520. PubMed PMID: 27851830; PubMed Central PMCID: PMC5113046.

2. Oehler D, Poehlein A, Leimbach A, Müller N, Daniel R, Gottschalk G, et al. Genome-guided analysis of physiological and morphological traits of the fermentative acetate oxidizer *Thermacetogenium phaeum*. BMC Genomics. 2012;13(1):723. doi: 10.1186/1471-2164-13-723.

Table S5. ABC transporter related genes found in *Thermacetogenium phaeum* and *Syntrophaceticus schinkii* genomes [1].

| <b><i>Thermacetogenium phaeum</i></b> | <b>Product</b>                                               |
|---------------------------------------|--------------------------------------------------------------|
| Tph_c00470                            | ABC transporter permease                                     |
| Tph_c01060                            | ABC transporter substrate-binding protein                    |
| Tph_c01070                            | ABC transporter, permease protein, FecCD family              |
| Tph_c01080                            | ABC transporter ATP-binding protein                          |
| Tph_c01190                            | ABC transporter permease                                     |
| Tph_c01200                            | ABC transporter ATP-binding protein                          |
| Tph_c01210                            | ABC transporter substrate-binding protein                    |
| Tph_c01550                            | ABC transporter permease                                     |
| Tph_c01560                            | ABC transporter ATP-binding protein                          |
| Tph_c01570                            | ABC transporter substrate-binding protein                    |
| Tph_c01600                            | Molybdate ABC transporter substrate-binding protein ModA     |
| Tph_c03230                            | ABC transporter ATP-binding protein                          |
| Tph_c03240                            | Cobalt ABC transporter permease CbiQ                         |
| Tph_c03410                            | Iron ABC transporter substrate binding protein               |
| Tph_c03420                            | ABC transporter, permease protein FecCD                      |
| Tph_c03430                            | Iron ABC transporter ATP-binding protein                     |
| Tph_c03500                            | ABC transporter                                              |
| Tph_c03550                            | Oligopeptide ABC transporter ATP-binding protein             |
| Tph_c03560                            | Oligopeptide ABC transporter ATP-binding protein             |
| Tph_c03980                            | ABC-type tungstate transport system, permease component TupB |
| Tph_c04360                            | ABC transporter ATP-binding protein                          |
| Tph_c04370                            | ABC-type cobalt import system, permease component            |
| Tph_c04860                            | Phosphate ABC transporter ATP-binding protein PstB           |
| Tph_c04880                            | Phosphate ABC transporter permease                           |
| Tph_c04890                            | Phosphate ABC transporter permease                           |
| Tph_c05200                            | Cobalt ABC transporter permease                              |
| Tph_c05210                            | Cobalt ABC transporter ATP-binding protein CbiO              |
| Tph_c09780                            | Cobalt ABC transporter permease CbiQ                         |
| Tph_c09790                            | Cobalt ABC transporter ATP-binding protein CbiO              |
| Tph_c10680                            | ABC transporter ATP-binding protein                          |
| Tph_c10690                            | ABC transport system permease                                |
| Tph_c13160                            | ABC transporter ATP-binding protein                          |
| Tph_c13800                            | Taurine ABC transport system permease protein TauC           |
| Tph_c13810                            | Taurine ABC transporter ATP-binding protein TauB             |
| Tph_c13820                            | Bicarbonate ABC transporter substrate binding protein        |
| Tph_c15200                            | ABC-1-like protein kinase                                    |
| Tph_c15800                            | Hemin ABC transporter ATP-binding protein HmuV               |
| Tph_c15810                            | Vitamin B12 ABC transport system permease protein BtuC       |
| Tph_c15820                            | Vitamin B12 ABC transporter substrate-binding protein BtuF   |
| Tph_c17070                            | D,D-dipeptide ABC transporter ATP-binding protein DppF       |
| Tph_c17080                            | D,D-dipeptide ABC transporter ATP-binding protein DppD       |
| Tph_c17090                            | D,D-dipeptide ABC transport system permease protein DppC     |
| Tph_c17100                            | D,D-dipeptide ABC transport system permease protein DdpB     |
| Tph_c17110                            | D,D-dipeptide ABC transporter substrate binding protein DdpA |
| Tph_c17920                            | Glutathione ABC transporter substrate protein GsiD           |
| Tph_c17930                            | Glutathione ABC transport system permease protein GsiC       |
| Tph_c17940                            | Glutathione ABC transport system permease protein GsiA       |
| Tph_c17950                            | Glutathione ABC transporter ATP-binding protein GsiA         |
| Tph_c18310                            | Cobalt import ABC transporter substrate-binding protein      |
| Tph_c18320                            | Cobalt import ABC transporter, permease protein              |
| Tph_c19110                            | ABC transporter-like protein                                 |
| Tph_c19120                            | ABC transporter ATP-binding protein YfiB                     |

|            |                                                                                        |
|------------|----------------------------------------------------------------------------------------|
| Tph_c20380 | ABC-type glycine betaine transport system, substrate-binding domain-containing protein |
| Tph_c20470 | ABC transporter permease protein YknZ                                                  |
| Tph_2236   | ABC transporter related protein (fragment)                                             |
| Tph_c22400 | ABC-3 family transport protein                                                         |
| Tph_c23550 | ABC transporter                                                                        |
| Tph_c23560 | ABC transporter                                                                        |
| Tph_c23600 | Antimicrobial peptide ABC transporter ATPase                                           |
| Tph_c23660 | ABC transporter permease                                                               |
| Tph_c23750 | Branched chain amino acid ABC transporter permease                                     |
| Tph_c24810 | ABC transporter ATP-binding protein                                                    |
| Tph_c24820 | ABC transporter ATP-binding protein                                                    |
| Tph_c25200 | Oligopeptide/dipeptide ABC transporter ATPase                                          |
| Tph_c25210 | ABC-2-like transporter, permease protein                                               |
| Tph_c26400 | Molybdate/tungstate ABC transporter substrate binding protein ModA                     |
| Tph_c26410 | Molybdate/tungstate ABC transport system permease protein ModB                         |
| Tph_c26420 | Molybdate/tungstate ABC transporter ATP-binding protein ModC                           |
| Tph_c27340 | Phosphate ABC transporter permease                                                     |
| Tph_c28160 | Serine protease/ABC transporter B family protein TagC                                  |
| Tph_c29150 | ABC transporter ATP-binding protein                                                    |

---

***Syntrophaceticus schinkii***

---

|             |                                                                                       |
|-------------|---------------------------------------------------------------------------------------|
| SSCH_30006  | ABC transporter polyketide tetronasin permease (fragment)                             |
| SSCH_60007  | Component of SufBCD complex, ATP-binding component of ABC superfamily                 |
| SSCH_80005  | Phosphate ABC transporter, inner membrane subunit PstA                                |
| SSCH_80006  | Phosphate ABC transporter, inner membrane subunit PstC                                |
| SSCH_80011  | Phosphate ABC transporter (ATP-binding protein)                                       |
| SSCH_110002 | Leucine/isoleucine/valine transporter subunit ; membrane component of ABC superfamily |
| SSCH_120026 | Excinuclease ABC (subunit C) (part 2)                                                 |
| SSCH_120027 | Exonuclease ABC subunit C (Part 1)                                                    |
| SSCH_120028 | Excinuclease ABC (subunit A)                                                          |
| SSCH_120029 | Fragment of excinuclease ABC (subunit B) (part 2)                                     |
| SSCH_120030 | Fragment of excinuclease ABC (subunit B) (part 1)                                     |
| SSCH_150006 | ABC transporter related                                                               |
| SSCH_160011 | Putative iron transport protein (ABC superfamily, membrane)                           |
| SSCH_160012 | ABC-type cobalamin/Fe <sup>3+</sup> -siderophore transport system, ATPase component   |
| SSCH_160014 | ABC-type Fe <sup>3+</sup> -hydroxamate transport system, periplasmic component        |
| SSCH_160016 | Putative iron transport protein (ABC superfamily, membrane)                           |
| SSCH_160017 | Uncharacterized ABC transporter ATP-binding protein HI_1272                           |
| SSCH_190010 | ABC transporter related protein                                                       |
| SSCH_200004 | ABC-type transporter, periplasmic subunit (fragment)                                  |
| SSCH_200005 | Daunorubicin resistance ABC transporter ATPase subunit                                |
| SSCH_200008 | ABC-type transporter, periplasmic subunit                                             |
| SSCH_200010 | ABC transporter related protein                                                       |
| SSCH_200011 | Oligopeptide ABC transporter, ATP-binding protein (fragment)                          |
| SSCH_200012 | Oligopeptide ABC transporter, ATP-binding protein OppD (fragment)                     |
| SSCH_220026 | Uncharacterized ABC transporter ATP-binding protein YthP                              |
| SSCH_250007 | ABC-2 type transporter (fragment)                                                     |
| SSCH_250013 | ABC-type transporter, periplasmic subunit                                             |
| SSCH_250014 | ABC-type transporter, integral membrane subunit                                       |
| SSCH_250022 | ABC transporter related protein (fragment)                                            |
| SSCH_260013 | ABC transporter (ATP-binding protein); efflux of cationic peptides                    |
| SSCH_270005 | ABC transporter, ATP-binding protein                                                  |
| SSCH_270006 | D-ribose transporter subunit ; membrane component of ABC superfamily                  |

SSCH\_300015 Uncharacterized ABC transporter ATP-binding protein TM\_0352 (fragment)  
 SSCH\_340008 Leucine/isoleucine/valine transporter subunit ; ATP-binding component of ABC superfamily  
 SSCH\_340009 ABC-type branched-chain amino acid transport systems, ATPase component  
 SSCH\_340010 ABC-type branched-chain amino acid transport system, periplasmic component  
 SSCH\_340011 ABC-type branched-chain amino acid transport system, permease component  
 SSCH\_340012 Branched-chain amino acid ABC-type transport system, permease component  
 SSCH\_350013 High affinity arginine ABC transporter (ATP-binding protein)  
 SSCH\_350014 Glutamine transporter subunit ; membrane component of ABC superfamily  
 SSCH\_350015 Glutamine transporter subunit ; periplasmic binding component of ABC superfamily  
 SSCH\_380001 Fragment of putative dipeptide transporter (ABC superfamily, ATP\_bind) (part 2)  
 SSCH\_380002 Fragment of putative dipeptide transporter (ABC superfamily, ATP\_bind) (part 1)  
 SSCH\_380005 Putative peptide transporter permease subunit: membrane component of ABC superfamily  
 SSCH\_380006 Nickel transporter subunit ; membrane component of ABC superfamily  
 SSCH\_380008 ABC transporter related protein  
 SSCH\_380026 DL-methionine transporter subunit ; periplasmic-binding component of ABC superfamily  
 SSCH\_380027 Fragment of methionine ABC transporter, permease component (part 2)  
 SSCH\_380028 Fragment of methionine ABC transporter, permease component (part 1)  
 SSCH\_380029 Methionine ABC transporter (ATP-binding protein)  
 SSCH\_390018 Putative ABC-type nitrate/sulfonate/bicarbonate transport systems, periplasmic components  
 SSCH\_470002 Uncharacterized ABC transporter ATP-binding protein YufO  
 SSCH\_470004 Nucleoside ABC transporter membrane protein (fragment)  
 SSCH\_470005 Putative transport protein (ABC superfamily, membrane)  
 SSCH\_500015 Putative ABC transporter ATP-binding protein BCE\_3323 (fragment)  
 SSCH\_520009 Phosphate ABC transporter membrane protein 2, PhoT family  
 SSCH\_520010 Phosphate ABC transporter membrane protein 1, PhoT family (fragment)  
 SSCH\_520064 Component of RuvABC resolvosome, endonuclease  
 SSCH\_530001 Oligopeptide ABC transporter (permease) (fragment)  
 SSCH\_540009 Oligopeptide/dipeptide ABC transporter, ATPase subunit  
 SSCH\_540011 ABC-type transporter, integral membrane subunit  
 SSCH\_540012 ABC-type transporter, integral membrane subunit  
 SSCH\_540013 ABC-type transporter, periplasmic subunit (fragment)  
 SSCH\_540014 ABC-type transporter, periplasmic subunit (fragment)  
 SSCH\_560020 ABC-type proline/glycine betaine transport systems, permease component(fragment 1 )  
 SSCH\_560021 Putative transporter subunit: ATP-binding component of ABC superfamily transporter  
 SSCH\_560023 Periplasmic glycine betaine/choline-binding (Lipo)protein of an ABC-type transport system (Osmoprotectant binding protein)  
 SSCH\_600044 ABC-1 domain protein  
 SSCH\_660007 ABC transporter, ATPase, predicted (fragment)  
 SSCH\_660008 ABC transporter, ATPase (fragment)  
 SSCH\_680012 Putative anion ABC transporter, solute-binding protein  
 SSCH\_680013 Molybdate ABC transporter, permease protein  
 SSCH\_680015 ABC-type transporter, periplasmic subunit (fragment)  
 SSCH\_710008 ABC transporter related

|              |                                                                                               |
|--------------|-----------------------------------------------------------------------------------------------|
| SSCH_730003  | ABC-type transporter, periplasmic subunit                                                     |
| SSCH_730007  | ABC-2 type transporter                                                                        |
| SSCH_730008  | ABC-2 type transporter                                                                        |
| SSCH_730023  | Putative peptide transporter permease subunit: membrane component of ABC superfamily (Part 1) |
| SSCH_730024  | Putative peptide transporter permease subunit: membrane component of ABC superfamily (Part 2) |
| SSCH_730025  | Putative Dipeptide ABC transporter, dipeptide-binding protein                                 |
| SSCH_730026  | Oligopeptide/dipeptide ABC transporter, ATPase subunit                                        |
| SSCH_730027  | Putative peptide transporter permease subunit: membrane component of ABC superfamily          |
| SSCH_750007  | Fragment of oligopeptide ABC transporter (permease) (part 1)                                  |
| SSCH_750008  | Fragment of oligopeptide ABC transporter (permease) (part 2)                                  |
| SSCH_750009  | Dipeptide transporter ; membrane component of ABC superfamily                                 |
| SSCH_750010  | Putative peptide ABC transporter ATP-binding protein y4tR                                     |
| SSCH_750011  | Oligopeptide transporter subunit ; ATP-binding component of ABC superfamily                   |
| SSCH_760014  | ABC transporter related                                                                       |
| SSCH_760015  | Uncharacterized ABC transporter permease protein YvrB                                         |
| SSCH_770009  | Oligopeptide ABC transporter (ATP-binding protein)                                            |
| SSCH_770010  | Oligopeptide ABC transporter (ATP-binding protein)                                            |
| SSCH_770011  | Dipeptide ABC transporter (permease)                                                          |
| SSCH_770012  | Oligopeptide ABC transporter (permease) (fragment)                                            |
| SSCH_790008  | Cobalt ABC transporter, inner membrane subunit CbiQ                                           |
| SSCH_810026  | ABC transporter substrate binding protein                                                     |
| SSCH_810027  | ABC-type transporter, integral membrane subunit                                               |
| SSCH_810042  | ABC transporter related protein                                                               |
| SSCH_850003  | Putative ABC-type transport system, permease component                                        |
| SSCH_870010  | Cobalt ABC transporter, inner membrane subunit CbiQ (fragment)                                |
| SSCH_960033  | Leucine/isoleucine/valine transporter subunit ; ATP-binding component of ABC superfamily      |
| SSCH_960034  | Leucine/isoleucine/valine transporter subunit ; ATP-binding component of ABC superfamily      |
| SSCH_1060012 | ABC-3 protein                                                                                 |
| SSCH_1060014 | ABC-type metal ion transporter, periplasmic subunit                                           |
| SSCH_1110003 | ABC-type Fe <sup>3+</sup> transport system periplasmic component-like protein                 |
| SSCH_1130011 | ABC transport system permease protein                                                         |
| SSCH_1130012 | ABC transporter substrate-binding protein                                                     |
| SSCH_1150029 | ABC-type transporter, periplasmic subunit                                                     |
| SSCH_1210009 | Putative multiple sugar ABC transporter (ATP-binding protein)                                 |
| SSCH_1220015 | Putative ABC-2 type transporter                                                               |
| SSCH_1220019 | Putative ABC transporter related protein                                                      |
| SSCH_1290008 | ABC transporter, ATP-binding protein                                                          |
| SSCH_1290009 | ABC transporter, ATP-binding protein                                                          |
| SSCH_1290015 | Uncharacterized ABC transporter ATP-binding protein YhaQ                                      |
| SSCH_1290016 | ABC-type Na <sup>+</sup> efflux pump permease component-like protein                          |
| SSCH_1350006 | ABC-type cobalt transport system, ATPase component (fragment 2)                               |
| SSCH_1350007 | ABC-type cobalt transport system, ATPase component (fragment 1)                               |
| SSCH_1350009 | ABC transporter, permease and ATP-binding protein (fragment)                                  |
| SSCH_1350019 | Putative ABC-2 type transporter, permease protein                                             |
| SSCH_1350024 | Putative ABC-2 type transporter, permease protein                                             |
| SSCH_1400002 | Putative Cobalt ABC transporter, inner membrane subunit CbiQ                                  |
| SSCH_1470005 | ABC transporter related protein                                                               |
| SSCH_1520006 | Molybdate transporter subunit ; membrane component of ABC superfamily                         |
| SSCH_1520007 | Molybdate transporter subunit ; periplasmic-binding component of ABC superfamily              |

|              |                                                                                                                                       |
|--------------|---------------------------------------------------------------------------------------------------------------------------------------|
| SSCH_1520012 | ABC transporter related protein (fragment)                                                                                            |
| SSCH_1520013 | ABC transporter related protein (fragment)                                                                                            |
| SSCH_1560001 | Putative ABC transporter (ATP-binding protein) (fragment)                                                                             |
| SSCH_1560002 | Predicted ABC transporter, permease component (fragment)                                                                              |
| SSCH_1560004 | Predicted ABC transporter, permease component (fragment)                                                                              |
| SSCH_1560005 | Predicted ABC transporter, ATPase component                                                                                           |
| SSCH_1690004 | Cell-division ABC transporter (ATP-binding protein)                                                                                   |
| SSCH_1730003 | Uncharacterized ABC transporter ATP-binding protein YknY (fragment)                                                                   |
| SSCH_1780002 | Periplasmic glycine betaine/choline-binding (Lipo)protein of an ABC-type transport system (Osmoprotectant binding protein) (fragment) |
| SSCH_1870001 | ABC-type multidrug transport system, ATPase component (fragment)                                                                      |
| SSCH_1870003 | ABC-2 type transporter (Part 1)                                                                                                       |
| SSCH_1870004 | ABC-2 type transporter (Part 2)                                                                                                       |
| SSCH_1950003 | Fragment of ABC transporter (ATP-binding protein) (part 2)                                                                            |
| SSCH_1950004 | Fragment of ABC transporter (ATP-binding protein) (part 1)                                                                            |
| SSCH_2060002 | ABC transporter family protein (fragment)                                                                                             |
| SSCH_2060004 | Uncharacterized ABC transporter ATP-binding protein TM_0352 (fragment)                                                                |
| SSCH_2410001 | ABC-type branched-chain amino acid transport system, periplasmic component (fragment)                                                 |
| SSCH_2620001 | Uncharacterized ABC transporter ATP-binding protein TM_0352 (fragment)                                                                |
| SSCH_2930001 | Uncharacterized ABC transporter ATP-binding protein YknY (fragment)                                                                   |

---

1. Manzoor S, Bongcam-Rudloff E, Schnurer A, Muller B. Genome-Guided Analysis and Whole Transcriptome Profiling of the Mesophilic Syntrophic Acetate Oxidising Bacterium *Syntrophaceticus schinkii*. PLoS ONE. 2016;11(11):e0166520. Epub 2016/11/17. doi: 10.1371/journal.pone.0166520. PubMed PMID: 27851830; PubMed Central PMCID: PMC5113046.
